# Supplementary material for: A high performance self-powered ultraviolet photodetector based on a p-GaN/n-ZnMgO heterojunction
Source: Royal Society of Chemistry journal article supplement (doi:10.1039/c9tc06416h), 2020-01-01
Supplement: c9tc06416h1.pdf [file c9tc06416h1.pdf]

## Supporting Information

### **A High Performance Self-powered Ultraviolet Photodetector Based on p-GaN/n-ZnMgO Heterojunction**

Yongxue Zhu,<sup>ab</sup> Kewei Liu,<sup>\*ab</sup> Qiu Ai,<sup>ab</sup> Qichao Hou,<sup>ab</sup> Xing Chen,<sup>a</sup> Zhenzhong Zhang,<sup>ab</sup>  
Xiuhua Xie,<sup>a</sup> Binghui Li<sup>a</sup> and Dezhen Shen<sup>\*ab</sup>

a. State Key Laboratory of Luminescence and Applications, Changchun Institute of Optics, Fine Mechanics and Physics, Chinese Academy of Sciences, Changchun 130033, China

b. Center of Materials Science and Optoelectronics Engineering, University of Chinese Academy of Sciences, Beijing 100049, China

E-mail: [liukw@ciomp.ac.cn](mailto:liukw@ciomp.ac.cn); shendz@ciomp.ac.cn

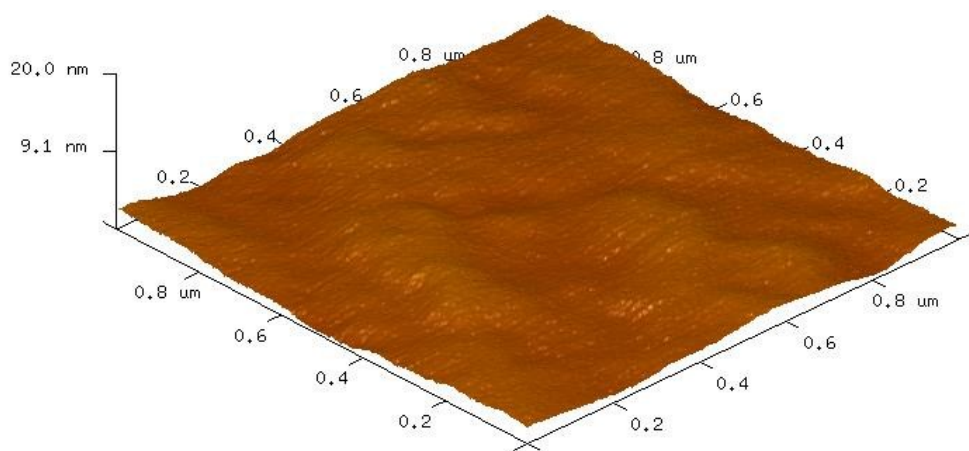

Figure S1. AFM image of p-GaN film grown on u-GaN/sapphire template by MBE

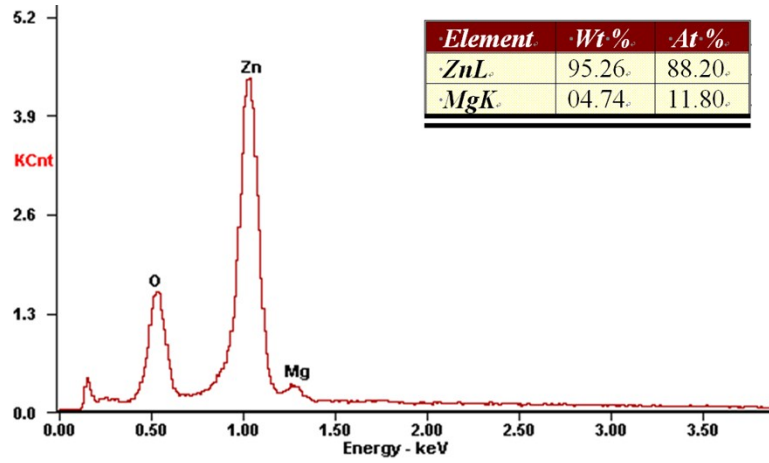

Figure S2. EDS spectrum of the n-ZnMgO film grown on the sapphire substrate by MOCVD

Table S1. Parameter comparisons of p-GaN used in previously reported p-GaN/n-Zn(Mg)O heterojunction photodetectors.

| Preparation method | FWHM(0002) | Hole concentration/(cm <sup>-3</sup> ) | Carrier mobility/(cm <sup>2</sup> /Vs) | Ref.      |
|--------------------|------------|----------------------------------------|----------------------------------------|-----------|
| commercial p-GaN   | --         | 3×10 <sup>17</sup>                     | 10                                     | 25        |
| MOCVD              | 0.078°     | 4×10 <sup>17</sup>                     | 5.06                                   | 18        |
| commercial HVPE    | --         | 1.1×10 <sup>17</sup>                   | 1                                      | 19        |
| commercial p-GaN   | --         | --                                     | --                                     | 26        |
| MBE                | 0.0584°    | 9.2×10 <sup>18</sup>                   | 2.2                                    | This work |
